# Supplementary material for: Magnetically separable and reusable rGO/Fe3O4 nanocomposites for the selective liquid phase oxidation of cyclohexene to 1,2-cyclohexane diol
Source: Royal Society of Chemistry journal article supplement (doi:10.1039/c9ra04685b), 2019-01-01
Supplement: c9ra04685b1.pdf [file c9ra04685b1.pdf]

## **SUPPLEMENTARY DATA**

### **Magnetically separable and reusable rGO/Fe<sub>3</sub>O<sub>4</sub> nanocomposites for the selective liquid phase oxidation of cyclohexene to 1,2-cyclohexane diol**

Manoj Pudukudy \*, Qingming Jia \*, Yanan Dong, Zhongxiao Yue, Shaoyun Shan  
Faculty of Chemical Engineering, Kunming University of Science and Technology, Kunming, 650500,  
Yunnan, People's Republic of China

\*Email: [manojpudukudy@gmail.com](mailto:manojpudukudy@gmail.com); [jiaqm411@163.com](mailto:jiaqm411@163.com)

### **Supplementary Figures**

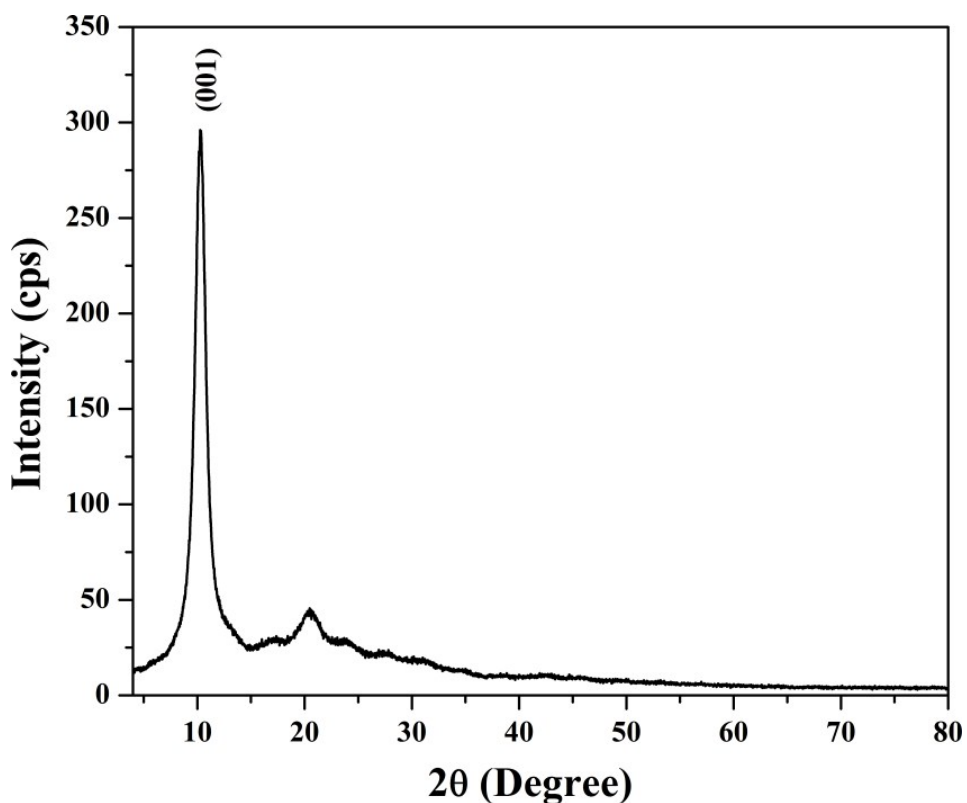

**Fig. S1-** XRD pattern of the graphite oxide prepared by modified Hummer's method

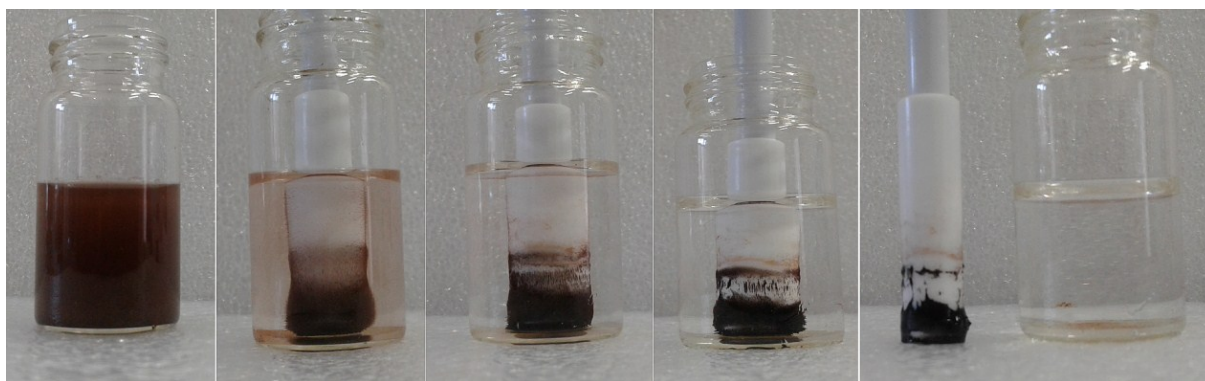

Fig. S2- Photograph of the magnetic separation of the nanocomposites from reaction mixture

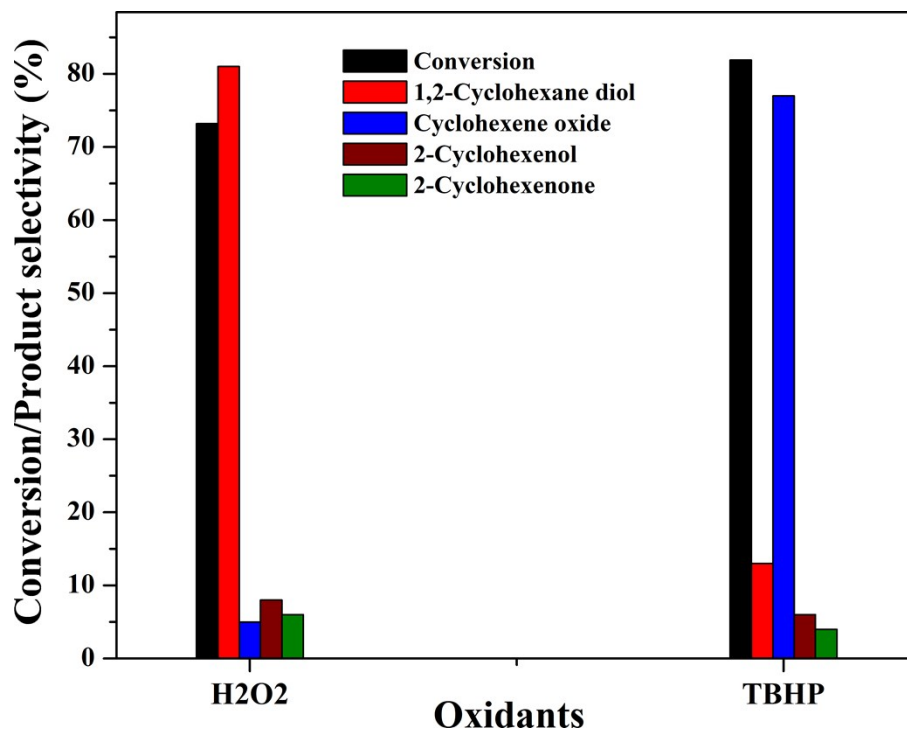

Fig. S3- Effect of different oxidants in the reaction (*Cyclohexene: 2 mmol, H<sub>2</sub>O<sub>2</sub>: 10 mmol, TBHP: 10 mmol; Acetonitrile: 5 ml, Catalyst: 5% rGO/Fe<sub>3</sub>O<sub>4</sub> nanocomposite, Catalyst dosage: 0.05 g, Temperature: 70°C, Reaction time: 5 hours, atmospheric pressure*)
